# Supplementary material
Source: PubMed Central journal article supplement (PMC4248863)
Supplement: JB.02026-14_zjb999093382so1.pdf [file JB.02026-14_zjb999093382so1.pdf]

**Supplementary Figure 1:** A metabolic map illustrating metabolic modules that are involved in methanol growth in *M. extorquens* PA1. Methanol dehydrogenase serves as the primary C<sub>1</sub> oxidation module that oxidizes methanol to formaldehyde. Formaldehyde is further oxidized to formate by a H<sub>4</sub>MPT mediated pathway which acts as the formaldehyde oxidation module. Formate is the branch point for metabolism - a part gets oxidized to CO<sub>2</sub> by formate dehydrogenases and the rest gets reduced and assimilated via a H<sub>4</sub>F mediated pathway and serine cycle. Genes highlighted in red, representative of a particular module, were deleted to test the role of the specific module in methylamine growth via the *N*-methylglutamate pathway.

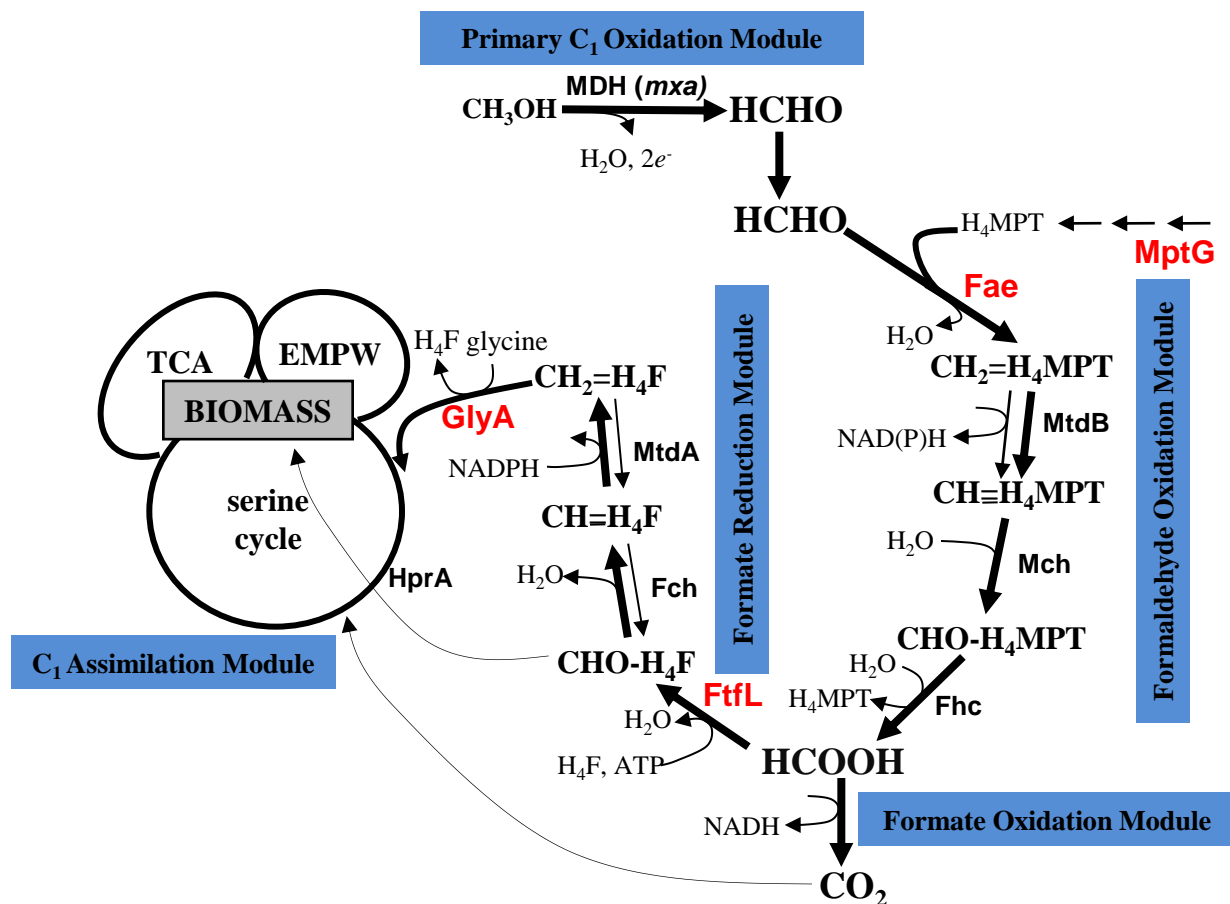

**Supplementary Figure 2:** A metabolic map illustrating the various metabolic modules that are involved in chloromethane growth in *M. extorquens* CM4. The primary C<sub>1</sub> oxidation module consists of CmuA and CmuB- that catalyze dehalogenation of chloromethane and subsequent methyl transfer to tetrahydrofolate (H<sub>4</sub>F) to form methyl tetrahydrofolate (CH<sub>3</sub>-H<sub>4</sub>F) - and MetF that catalyzes the reduction of CH<sub>3</sub>-H<sub>4</sub>F to methylene tetrahydrofolate (CH<sub>2</sub>=H<sub>4</sub>F). CH<sub>2</sub>=H<sub>4</sub>F is the branch point of metabolism –a part gets oxidized by methylene tetrahydrofolate reductase (*folD*) and formyl tetrahydrofolate hydrolase (*purU*) to formate, which subsequent gets oxidized to CO<sub>2</sub> by a panel of formate dehydrogenases, and the rest gets assimilated via the serine cycle. \**metF*, *folD*, and *purU* are absent in *M. extorquens* PA1

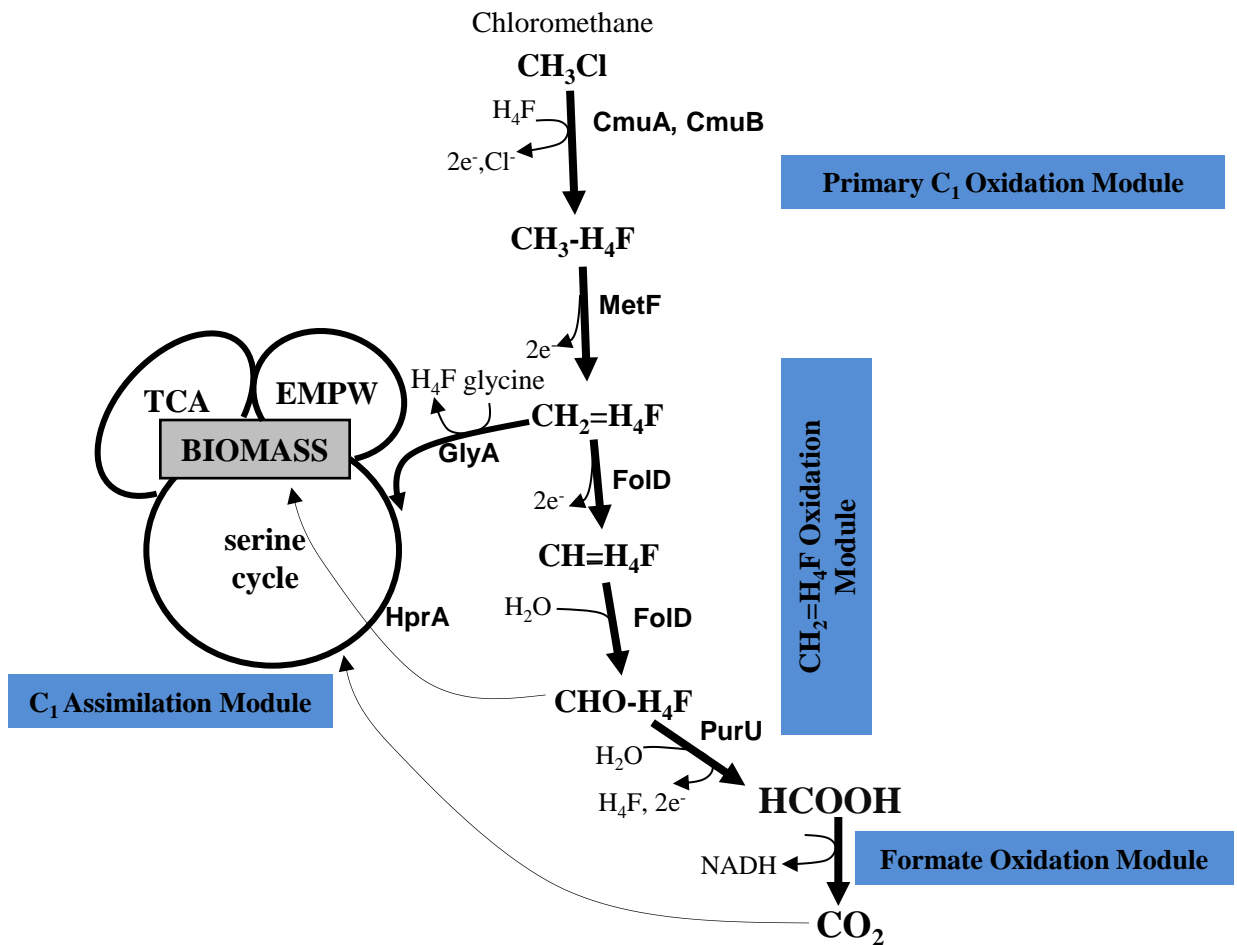

**Supplementary Figure 3: A)** Ratio of growth rates, of various knockout mutants versus the  $\Delta cel$  ‘wildtype’ strain of PA1 and, in 3.5 mM succinate (white), 15mM methanol (light brown), nitrogen free media with 3.5 mM succinate and 7.66 mM methylamine (dark gray) and 15mM methylamine (blue) **B)** Ratio of yield (measured as the maximum OD<sub>600</sub> value during growth) of various knockout mutants versus  $\Delta cel$  ‘wildtype’ strain of PA1, in 3.5 mM succinate (white), 15mM methanol (light brown), nitrogen free media with 3.5 mM succinate and 7.66 mM methylamine (dark gray) and 15mM methylamine (blue). Error bars represent the 95% C.I. of the average ratio of three biological replicates grown in each condition. A X indicates that the mutants did not grow in methanol. **NOTE: The y-axis doesn’t start at 0.0 but at 0.5 (for growth rate ratios) and 0.4 (for yield ratios). This was done to highlight subtle changes in growth/yield for these mutants**

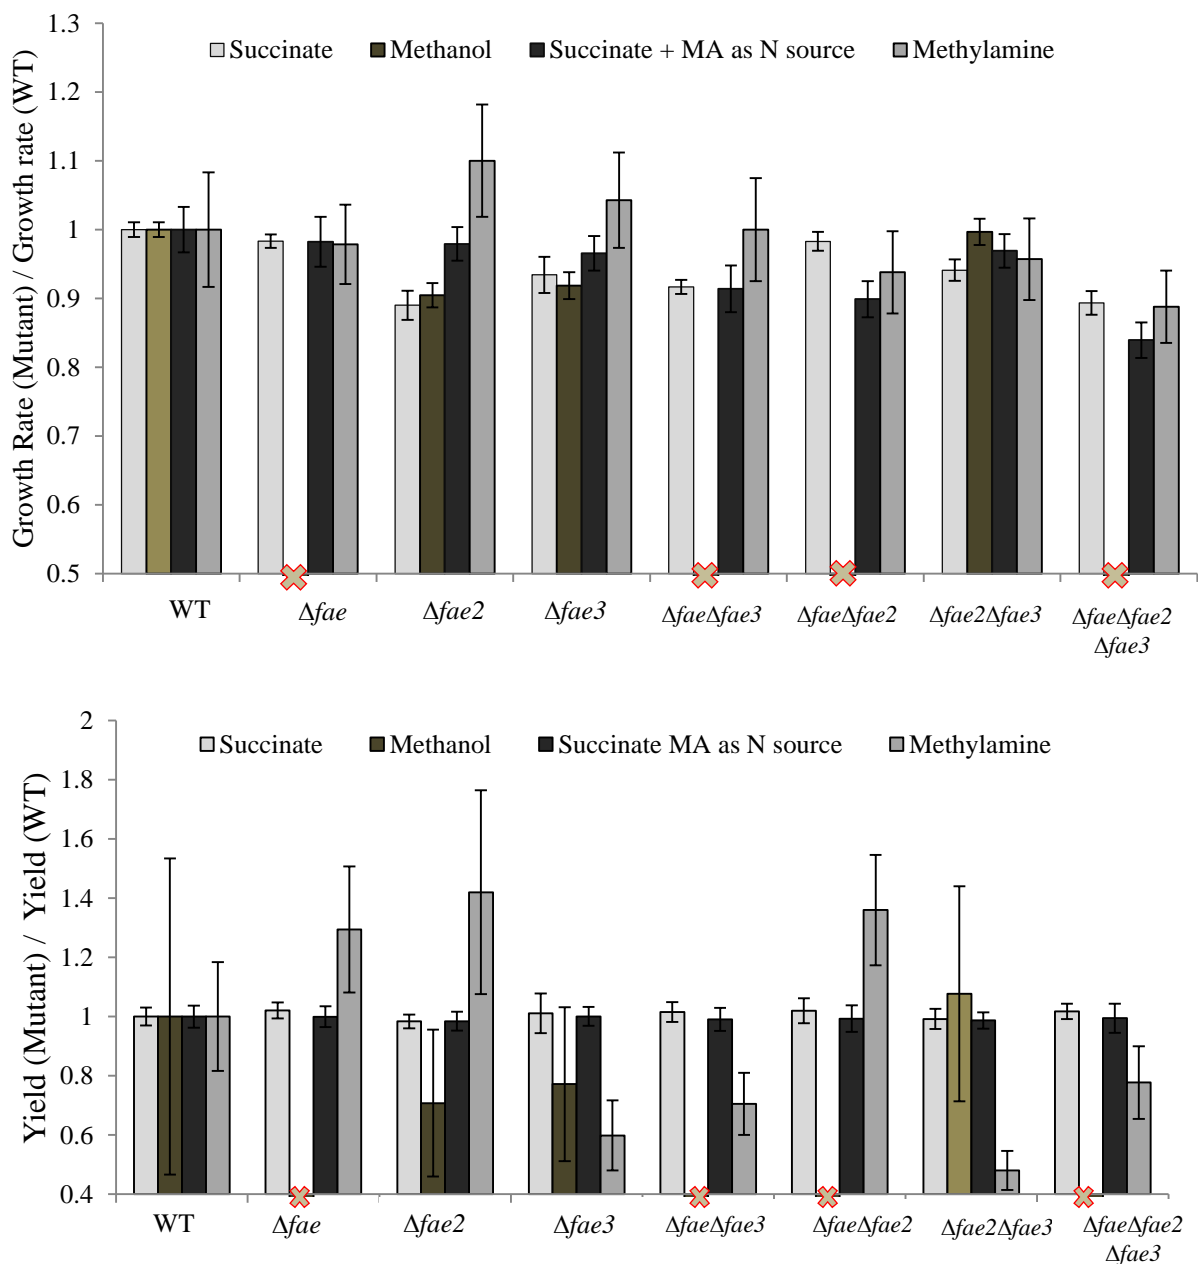

**Supplementary Figure 4:** Amino acid alignment of FAE, FAE2 and FAE3 from *M. extroquens* PA1 (using MUSCLE: <https://www.ebi.ac.uk/Tools/msa/muscle/> with standard settings and 150 iterations). The highlighted residues in FAE interact with methyl groups present in tetrahydromethanopterin (H<sub>4</sub>MPT), absent in H<sub>4</sub>F. These interactions are responsible for the specificity of FAE to H<sub>4</sub>MPT. Two of these residues are identical and one residue (Y173) has similar properties in FAE2. Only one residue is identical in FAE3.

```

FAE 1      10      20      30      40
FAE MAKITKVOVGEALV--GDGN-EVAHIDLIIIGPRGSPAETAFC
FAE2 MSDRIILRAGEALVAGGPPN-TASEPEVIIGELDGPVGTALA
FAE3 MSE-IWFRTEGATVLA AEGQFTDAMPEVLIGSTRGPPVGHGFA

      50      60      70      80
FAE NGLVNNKHGFTSLLAVIAPNLPCKPNTLMFNKVTINDAROAV
FAE2 TLTGDOVVGHSRVFALLNTDIMVRPVTLCVSKVSVTENKYTS
FAE3 SMLG-QVQGHTRMFVVRDLNQLVRPSTIMTTKVTIHTAEYAE

      90     100     110     120
FAE QMF GPAOHGVAMAVODAVAEGIIPADEADDLYVLVGVFI---
FAE2 ILMGTVOYAIANGVLD AVRAGYIPKEKANDLGIICSVWLSPG
FAE3 LLGGVVQAATA DAIVDCVIEGILPKDGLDEL CMIITIWLDER

      130     140     150     160
FAE --HWEAADDAKIOKYNYEATKLSIORAVNGEPKASVVTEORK
FAE2 VIOAESVDHKALFEIORKGMTEAIRKAMTNEPSIDWLL ENOD
FAE3 CGTDENLDRKDL YRTNYEATKLAIARAMKGEPTIDELIANRK

      170     180     183
FAE SATHPFAANA
FAE2 KIVHKYYOMGIDGKI
FAE3 TVKH YALEDIIEY

```

**Supplementary Table 1:** Growth rates of the  $\Delta cel$  'wildtype' strain of PA1 and the  $\Delta mptG$  mutant (in the WT background) in 3.5 mM succinate with either 7.66 mM  $\text{NH}_4^+$  as the nitrogen source or 7.66 mM methylamine as the nitrogen source. S.E.M. represents the standard error of the mean growth rate for three biological replicates in each condition.

| Strain        | Nitrogen Source | Mean Growth Rate ( $\text{h}^{-1}$ ) | S.E.M. ( $\text{h}^{-1}$ ) |
|---------------|-----------------|--------------------------------------|----------------------------|
| WT            | $\text{NH}_4^+$ | 0.213                                | 0.002                      |
| $\Delta mptG$ | $\text{NH}_4^+$ | 0.184                                | 0.002                      |
| WT            | Methylamine     | 0.188                                | 0.001                      |
| $\Delta mptG$ | Methylamine     | 0.148                                | 0.002                      |

**Supplementary Table 2:** Growth rates and maximum OD<sub>600</sub> of the  $\Delta cel$  ‘wildtype’ strain of PA1 and single-, double-, triple-knockout mutant (in the WT background) lacking  $\Delta fae$ ,  $\Delta fae2$ , and/or  $\Delta fae3$  in 15mM methylamine

| Strain                                | Mean Growth Rate (h <sup>-1</sup> ) ± 95% C.I. (h <sup>-1</sup> ) | Average Max. OD <sub>600</sub> ± 95% C.I. |
|---------------------------------------|-------------------------------------------------------------------|-------------------------------------------|
| WT                                    | 0.0422±0.0018                                                     | 0.712±0.071                               |
| $\Delta fae$                          | 0.0407±0.0004                                                     | 1.044±0.058                               |
| $\Delta fae 2$                        | 0.0476±0.0015                                                     | 1.165±0.146                               |
| $\Delta fae 3$                        | 0.0427±0.0011                                                     | 0.413±0.049                               |
| $\Delta fae -\Delta fae2$             | 0.0386±0.0008                                                     | 1.003±0.033                               |
| $\Delta fae -\Delta fae3$             | 0.0406±0.0006                                                     | 0.558±0.021                               |
| $\Delta fae2-\Delta fae3$             | 0.0409±0.0015                                                     | 0.357±0.011                               |
| $\Delta fae -\Delta fae2-\Delta fae3$ | 0.0375±0.0003                                                     | 0.555±0.040                               |

**Supplementary Table 3:** List of primers used to construct knockout mutants in the *N*-methylglutamate pathway as well as FAE-homologs in this study

| Primer                   | Primer Sequence                                                  | Primer Description                                                                             |
|--------------------------|------------------------------------------------------------------|------------------------------------------------------------------------------------------------|
| $\Delta$ fae2_us_f       | ATGGATGCATATGCTGCAGCTCGAGCGGCCGCT<br>CTGCATCAGGTCGTGCAGG         | Gibson forward linker with Not1 and 24 bp of pCM433 backbone at 5' end. Product size = 311 bp  |
| $\Delta$ fae2_us_r       | CTTTTCGACACTCAAACGCATCGAAGCGCGAGG<br>ATGATGCGGTCGCTCATGG         | 30 bp of ds region linker at 5'end. Product size = 311 bp                                      |
| $\Delta$ fae2_ds_f       | CGCGCTTCGATGCGTTTGAG                                             | Product size = 412 bp                                                                          |
| $\Delta$ fae2_ds_r       | GGTTAACACGCGTACGTAGGGCCCGGCCGCC<br>GACACCTCGTCTGTCTCAAG          | Gibson reverse linker with Not1 and 24 bp of pCM433 backbone at 5' end. Product size = 412 bp  |
| $\Delta$ fae3_us_f       | GCGGAACCAGATCTCGGACATG                                           | Product size = 252 bp                                                                          |
| $\Delta$ fae3_us_r       | GGTTAACACGCGTACGTAGGGCCCGGCCCGCT<br>TCCCTCGCTGATCCACTG           | Gibson reverse linker with Not1 and 24 bp of pCM 433 backbone at 5' end. Product size = 252 bp |
| $\Delta$ fae3_ds_f       | ATGGATGCATATGCTGCAGCTCGAGCGGCCGCC<br>GATGGTCACCCTTCAGGTG         | 30 bp of us region linker at 5'end. Product size = 420 bp                                      |
| $\Delta$ fae3_ds_r       | ATGACCGACATGTCCGAGATCTGGTCCGCGCC<br>TCACGCGAGAAGACTAC            | Gibson forward linker with Not1 and 24 bp of pCM433 backbone at 5' end. Product size = 420 bp  |
| $\Delta$ mgs1,2,3_us_f   | ATGGATGCATATGCTGCAGCTCGAGCGGCCCGCG<br>GCAATGGAGGCGAATCTCG        | Gibson forward linker with Not1 and 24 bp of pCM433 backbone at 5'end. Product size =433 bp    |
| $\Delta$ mgs1,2,3_us_r   | TCGCGGCCCTCGTGCCAATCGTCATAGGCGCGT<br>TCGATCACTGTCGCGAG           | 30 bp of ds region linker at 5'end. Product size = 433 bp                                      |
| $\Delta$ mgs1,2,3_ds_f   | CGCCTATGACGATTGGCACG                                             | Product size = 441 bp                                                                          |
| $\Delta$ mgs1,2,3_ds_r   | GGTTAACACGCGTACGTAGGGCCCGGCCGCC<br>AGATCGGTGTAGGACACGAGG         | Gibson reverse linker with Not1 and 24 bp of pCM 433 backbone at 5' end. Product size = 441 bp |
| $\Delta$ gmas_us_f       | ATGGATGCATATGCTGCAGCTCGAGCGGCCCGCT<br>CGCAGTGATGACGCTGGAG        | Gibson forward linker with Not1 and 24 bp of pCM433 backbone at 5'end. Product size =492 bp    |
| $\Delta$ gmas_us_r       | CGCTTGACGCCCTCCACCGTGTGCCGCTCGGTGT<br>ACATGTTTCCAGGGGAGCTGGATCAG | 30 bp of ds region linker at 5'end. Product size = 492 bp                                      |
| $\Delta$ gmas_ds_f       | ACATGTACACCGACGGGCAC                                             | Product size = 435 bp                                                                          |
| $\Delta$ gmas_ds_r       | GGTTAACACGCGTACGTAGGGCCCGGCCCGCT<br>GGCCACGATTAGGGCGAAG          | Gibson reverse linker with Not1 and 24 bp of pCM 433 backbone at 5' end. Product size = 435 bp |
| $\Delta$ mgd1,2,3,4_us_f | GACGATCACCACGTCGTAGG                                             | Product size = 493 bp                                                                          |
| $\Delta$ mgd1,2,3,4_us_r | GGTTAACACGCGTACGTAGGGCCCGGCCCGCT<br>AGAGTTCGAGCCCGACAG           | Gibson reverse linker with Not1 and 24 bp of pCM 433 backbone at 5'end. Product size = 493 bp  |
| $\Delta$ mgd1,2,3,4_ds_f | ATGGATGCATATGCTGCAGCTCGAGCGGCCGCC<br>TCGACTCGTACGCGCATTG         | 30 bp of us region linker at 5'end. Product size = 607 bp                                      |
| $\Delta$ mgd1,2,3,4_ds_r | CCGCAGGAGGCCCTACGACGTGGTGATCGTCTGA<br>CGAGCATCGCCATCTC           | Gibson forward linker with Not1 and 24 bp of pCM433 backbone at 5' end. Product size = 607 bp  |
